# Supplementary material
Source: PubMed Central journal article supplement (PMC4184927)
Supplement: NIHMS620076-supplement-2.pdf [file NIHMS620076-supplement-2.pdf]

## Supplemental Tables

Table S1: Analysis of Notch gene rearrangements in triple negative breast cancer subtypes

| <i>NOTCH1</i> or <i>NOTCH2</i> | Basal    | Immune    | Luminal AR | Mesenchymal Stem Like |
|--------------------------------|----------|-----------|------------|-----------------------|
| WT                             | 27 (87%) | 24 (100%) | 4 (66%)    | 5 (100%)              |
| Rearranged                     | 4 (13%)  | 0         | 2 (33%)    | 0                     |

Table S2: Genes whose expression correlates with Notch gene-rearrangement status in cancer cell lines

| Gene          | Notch wild type (N=603)* | Notch-gene-rearranged (N=6) | STD_WT | STD_GR | p value  |
|---------------|--------------------------|-----------------------------|--------|--------|----------|
| <i>HES4</i>   | 1.78                     | 2.28                        | 0.16   | 0.07   | 5.53E-14 |
| <i>HES5</i>   | 1.42                     | 1.87                        | 0.16   | 0.54   | 3.15E-10 |
| <i>PTCRA</i>  | 1.41                     | 1.86                        | 0.17   | 0.54   | 6.46E-10 |
| <i>NOTCH1</i> | 2.65                     | 3.18                        | 0.27   | 0.35   | 3.12E-06 |
| <i>DTX1</i>   | 1.45                     | 2.41                        | 0.53   | 0.58   | 1.22E-05 |
| <i>NOTCH3</i> | 1.62                     | 2.53                        | 0.40   | 0.29   | 4.17E-05 |
| <i>PSEN2</i>  | 2.26                     | 1.74                        | 0.34   | 0.84   | 0.00022  |

\*Average log<sub>10</sub> expression; STD\_WT and STD\_GR, standard deviations of wild type and Notch gene-rearranged cell lines, respectively.

**Table S3: Genes whose expression correlates with Notch gene-rearrangement in triple negative breast cancer**

| Gene     | Notch wild type (N=207)* | Notch-gene-rearranged (N=13)* | STD_WT | STD_GR | p value  |
|----------|--------------------------|-------------------------------|--------|--------|----------|
| 'HES4'   | 1.81                     | 2.17                          | 0.14   | 0.2    | 3.89E-15 |
| 'HES5'   | 1.31                     | 1.72                          | 0.2    | 0.58   | 3.99E-09 |
| 'NRARP'  | 2.56                     | 3.07                          | 0.32   | 0.39   | 1.33E-07 |
| 'NOTCH1' | 2.83                     | 3.16                          | 0.24   | 0.34   | 3.05E-06 |
| 'HEY2'   | 2.29                     | 2.89                          | 0.47   | 0.58   | 1.76E-05 |
| 'MYC'    | 2.71                     | 3.11                          | 0.34   | 0.3    | 4.67E-05 |
| 'HEY2'   | 2.37                     | 2.82                          | 0.46   | 0.5    | 0.00072  |
| 'JAG1'   | 1.16                     | 1.42                          | 0.25   | 0.35   | 0.00076  |
| 'HES1'   | 2.72                     | 2.9                           | 0.19   | 0.19   | 0.00094  |

\*Average log10 expression; STD\_WT and STD\_GR, standard deviations of wild type and Notch gene-rearranged cell lines, respectively.

**Table S4. Novel mutations identified in the NRR and PEST domains of NOTCH1 in solid tumors (N=4007).**

| Receptor      | Mutation            | Sequence           | Location    | Tumor Site     | Tumor Type                |
|---------------|---------------------|--------------------|-------------|----------------|---------------------------|
| Notch1        | <b>I1680S</b>       | LE <u>S</u> DN     | NRR         | <b>BREAST</b>  | <b>Breast,TN</b>          |
| Notch1        | <b>I1680N</b>       | LE <u>N</u> DN     | NRR         | <b>H&amp;N</b> | <b>Adenoid Cystic</b>     |
| Notch1        | <b>E1567K</b>       | VP <u>K</u> RL     | NRR         | <b>Breast</b>  | <b>Breast, Luminal B</b>  |
| Notch1        | <b>A1552G</b>       | NSA <u>E</u> C     | NRR         | <b>BREAST</b>  | <b>Breast,TN</b>          |
| Notch1        | A1552V              | NS <u>V</u> EC     | NRR         | ENDOMETRIUM    | Adenocarcinoma            |
| Notch1        | A1570G              | RL <u>G</u> AG     | NRR         | KIDNEY         | RCC, Clear Cell Type      |
| Notch1        | R1627L              | EL <u>L</u> KH     | NRR         | Stomach        | Carcinoma, Neuroendocrine |
| Notch1        | V1575A              | TL <u>A</u> VV     | NRR         | Skin           | Melanoma                  |
| Notch1        | V1599M              | SR <u>M</u> LH     | NRR         | BRAIN          | Glioblastoma              |
| Notch1        | A1707T              | AL <u>T</u> SL     | NRR         | CERVIX         | Adenocarcinoma            |
| Notch1        | R1683W              | DN <u>W</u> QC     | NRR         | COLON          | Adenocarcinoma            |
| Notch1        | V1676I              | SI <u>I</u> YL     | NRR         | PANCREAS       | Carcinoma, Anaplastic     |
| <b>Notch1</b> | <b>2426_2431del</b> | <b>del(SGHLGR)</b> | <b>PEST</b> | <b>BREAST</b>  | <b>Breast,TN</b>          |
| <b>Notch1</b> | <b>S2228Y</b>       | SP <u>S</u> VP     | <b>PEST</b> | <b>BREAST</b>  | <b>Breast,Luminal B</b>   |

NRR, Negative Regulatory Region; PEST, PEST degron domain. Mutations in Breast and adenoid cystic carcinoma are highlighted in bold. H&N, head and neck; RCC, renal cell carcinoma.

**Table S5: Notch NRR and PEST domain mutation frequency**

| <b>Cancer types</b>              | <b>Notch1</b> | <b>Notch2</b> | <b>Notch3</b> | <b>Tumors sequenced</b> | <b>Mutation frequency</b> |
|----------------------------------|---------------|---------------|---------------|-------------------------|---------------------------|
| Cutaneous SCC                    | 1             | 2             | 1             | 7                       | 57%                       |
| Mantle cell lymphoma             | 1             | 0             | 0             | 2                       | 50%                       |
| Adenoid cystic carcinoma         | <b>1</b>      | <b>0</b>      | <b>0</b>      | <b>3</b>                | <b>33%</b>                |
| Cervical carcinoma               | 5             | 2             | 1             | 49                      | 16%                       |
| Gastric carcinoma                | 3             | 1             | 0             | 30                      | 13%                       |
| Head-Neck SCC                    | 2             | 2             | 2             | 65                      | 9%                        |
| Pancreatic carcinoma             | 3             | 4             | 0             | 94                      | 7%                        |
| Chronic lymphocytic leukemia     | 8             | 1             | 0             | 126                     | 7%                        |
| Glioblastoma, Astrocytoma        | 1             | 1             | 1             | 36                      | 8%                        |
| Endometrial carcinoma            | 14            | 7             | 4             | 344                     | 7%                        |
| Melanoma                         | 8             | 5             | 0             | 222                     | 6%                        |
| Prostatic carcinoma              | 1             | 2             | 0             | 53                      | 6%                        |
| Ovarian serous carcinoma         | 5             | 3             | 0             | 147                     | 5%                        |
| Colonic carcinoma                | 16            | 9             | 4             | 504                     | 6%                        |
| Ovarian mucinous carcinoma       | 1             | 1             | 0             | 38                      | 5%                        |
| Triple negative breast carcinoma | 4             | 1             | 0             | 105                     | 5%                        |

SCC, squamous cell carcinoma

**Table S6: *NOTCH1* mutational status, N1-ICD levels, MYC expression in adenoid cystic carcinoma models**

| ACC model | <i>NOTCH1</i> mutation* | Exon    | Amino acid change | Mutated region | N1-ICD levels (% positive cells) | MYC IHC (% positive cells) |
|-----------|-------------------------|---------|-------------------|----------------|----------------------------------|----------------------------|
| ACCX14    | WT                      | -       | -                 | -              | 5-10%                            | 50%                        |
| ACCX16    | WT                      | -       | -                 | -              | 30%                              | 30-40%                     |
| ACCX5M1   | C3011T                  | Exon 19 | S1004L            | EGF domain     | 30%                              | 60-70%                     |
| ACCX6     | WT                      | -       | -                 | -              | 30%                              | 80-90%                     |
| ACCX9     | T5039A                  | Exon 27 | I1680N            | NRR region     | 100%                             | 90%                        |
| POS-0912  | G1094A                  | Exon 6  | R365H             | EGF domain     | 5%                               | 20-30%                     |

\*Numbers correspond to codons in the *NOTCH1* coding sequence; WT, wild type.

**Table S7: Primary antibodies and Catalog Numbers**

| Antibody       | Cell Signaling Technologies | Santa Cruz | Abcam  |
|----------------|-----------------------------|------------|--------|
| MYC            | 9402                        |            |        |
| p-Rb           | 9307                        |            |        |
| N1-ICD         | 4147                        |            |        |
| p21            | 2947                        |            |        |
| p-ERK          | 4370                        |            |        |
| CLEAVED PARP   | 5625                        |            |        |
| Notch 1        |                             | sc-6014    |        |
| GAPDH          | 5174                        |            |        |
| p-PRAS40       | 2997                        |            |        |
| AKT            | 9272                        |            |        |
| $\beta$ -actin |                             |            | ab8226 |

**Table S8: RT-PCR Primers**

| Gene         | Cat #           |
|--------------|-----------------|
| <i>CD24</i>  | Hs02379687_s1   |
| <i>CD44</i>  | Hs01075861_m1   |
| E-Cadherin   | Hs01023894_m1   |
| N-Cadherin   | Hs00362037_m1   |
| P-Cadherin   | Hs00999918_m1   |
| <i>DTX1</i>  | Hs00269995_m1   |
| <i>EGFR</i>  | Hs01076078_m1   |
| <i>EPCAM</i> | Hs00901885_m1   |
| <i>FN1</i>   | Hs00365052_m1   |
| <i>FOXC1</i> | Hs01071515_s1   |
| <i>GAPDH</i> | 4352934-1101034 |
| <i>GSC</i>   | Hs00906630_g1   |
| <i>HES1</i>  | Hs00172878_m1   |
| <i>HES4</i>  | Hs00368353_g1   |

|               |               |
|---------------|---------------|
| <i>HES5</i>   | Hs01387464_g1 |
| <i>HEY2</i>   | Hs00232622_m1 |
| <i>HEYL</i>   | Hs00232718_m1 |
| <i>IL6</i>    | Hs00985639_m1 |
| <i>KRT14</i>  | Hs00265033_m1 |
| <i>KRT19</i>  | Hs00761767_s1 |
| <i>KRT8</i>   | Hs01595539_g1 |
| <i>MME</i>    | Hs00153510_m1 |
| <i>MYC</i>    | Hs99999003_m1 |
| <i>NOTCH1</i> | Hs01062011_m1 |
| <i>NRARP</i>  | Hs01104102_s1 |
| <i>PTCRA</i>  | Hs00300125_m1 |
| <i>SHQ1</i>   | Hs00250772_m1 |
| <i>SMA4</i>   | Hs02341953_m1 |
| <i>SNAI1</i>  | Hs00195591_m1 |
| <i>SNAI2</i>  | Hs00950344_m1 |
| <i>SNAI3</i>  | Hs01018996_m1 |
| <i>SOX10</i>  | Hs00366918_m1 |
| <i>SPARC</i>  | Hs00234160_m1 |
| <i>TGFB1</i>  | Hs00998133_m1 |
| <i>TP63</i>   | Hs00978343_m1 |
| <i>TWIST1</i> | Hs01675818_s1 |
| <i>VIM</i>    | Hs00185584_m1 |
| <i>ZEB1</i>   | Hs00232783_m1 |
